# Supplementary material for: Prospective study on diagnostic efficacy of targeted NGS vs. traditional testing for respiratory infections in myelosuppressed hematology patients
Source: Front Med (Lausanne). 2025 Mar 12;12:1488652. doi: 10.3389/fmed.2025.1488652 (PMC11936813; doi:10.3389/fmed.2025.1488652)
Supplement: Supplementary Table S4 — Prices for different items. [file Table_4.xlsx]

## Sheet: Sheet1
Name	Price(RMB)	Total(RMB)
tNGS	750	750
general bacterial culture	90	849
blood culture	380
fungal culture	60
fungal smear examination	5
respiratory hexapathogen detection (virus)	300
SARS-CoV-2 nucleic acid detection	14
